# Supplementary material for: Interleukin-27 as a Novel Biomarker for Early Cardiopulmonary Failure in Enterovirus 71-Infected Children with Central Nervous System Involvement
Source: Hindawi journal article supplement (doi:10.1155/2016/4025167), 2016-01-01
Supplement: f1 [file 4025167.f1.pdf]

## Supplementary Digital Content 1

**TABLES SI. Genotype and allele frequencies of IL-27 p28 polymorphism in EV71-infected patients**

| SNP        | Genotype and allele | Stage II (n = 55) | Stage III-IV (n = 72) | $\chi^2$ | P-value | Unadjusted OR (95% CI) |
|------------|---------------------|-------------------|-----------------------|----------|---------|------------------------|
| rs153109   | TT                  | 24 (43.64)        | 33 (45.83)            | 0.061    | 0.805   | 0.915 (0.451–1.854)    |
|            | CT                  | 25 (45.45)        | 31 (43.06)            | 0.073    | 0.787   | 1.102 (0.544–2.235)    |
|            | CC                  | 7 (12.73)         | 7 (9.72)              | 2.027    | 0.155   | 2.479 (0.687–8.945)    |
|            | T                   | 73 (66.36)        | 97 (67.36)            | 0.028    | 0.867   | 0.956 (0.564–1.620)    |
|            | C                   | 39 (35.45)        | 45 (31.25)            | 0.498    | 0.480   | 1.208 (0.714–2.045)    |
| rs17855750 | TT                  | 47 (85.45)        | 63 (87.50)            | 0.113    | 0.737   | 0.839 (0.301–2.339)    |
|            | GT                  | 8 (14.55)         | 9 (12.5)              | 0.113    | 0.737   | 1.191 (0.428–3.320)    |
|            | T                   | 102 (92.73)       | 135 (93.75)           | 0.105    | 0.747   | 0.850 (0.317–2.280)    |
|            | G                   | 8 (7.27)          | 9 (6.25)              | 0.105    | 0.747   | 1.176 (0.439–3.156)    |
| rs181206   | TT                  | 48 (87.27)        | 63 (87.50)            | 0.001    | 0.970   | 0.980 (0.340–2.819)    |
|            | TC                  | 7 (12.73)         | 9 (12.5)              | 0.001    | 0.970   | 1.021 (0.355–2.938)    |
|            | T                   | 103 (93.64)       | 135 (93.75)           | 0.001    | 0.971   | 0.981 (0.354–2.722)    |
|            | C                   | 7 (6.36)          | 9 (6.25)              | 0.001    | 0.971   | 1.019 (0.367–2.829)    |
